# Supplementary material for: Diagnosis of Human Leptospirosis in a Clinical Setting: Real-Time PCR High Resolution Melting Analysis for Detection of Leptospira at the Onset of Disease
Source: PubMed Central journal article supplement (PMC6003994; doi:10.1038/s41598-018-27555-2), 2018-06-15
Supplement: 41598_2018_27555_MOESM1_ESM.pdf [file 41598_2018_27555_MOESM1_ESM.pdf]

## SUPPLEMENTARY INFORMATION

### **Diagnosis of Human Leptospirosis in a Clinical Setting: Real-Time PCR High Resolution Melting Analysis for Detection of *Leptospira* at the Onset of Disease**

Lisa M. Esteves<sup>1</sup>, Sara M. Bulhões<sup>1</sup>, Claudia C. Branco<sup>1,2,3</sup>, Teresa Carreira<sup>4</sup>,  
Maria L. Vieira<sup>4</sup>, Maria Gomes-Solecki<sup>5</sup> & Luisa MotaVieira<sup>1,2,3\*</sup>

<sup>1</sup>Molecular Genetics and Pathology Unit, Hospital of Divino Espírito Santo of Ponta Delgada, EPER, São Miguel Island, Azores, Portugal. <sup>2</sup>Azores Genetics Research Group, Instituto Gulbenkian de Ciência, Oeiras, Portugal. <sup>3</sup>Centre for Biodiversity, Functional and Integrative Genomics, Faculty of Sciences, University of Lisboa, Portugal. <sup>4</sup>Global Health and Tropical Medicine (GHTM), Instituto de Higiene e Medicina Tropical (IHMT), Universidade Nova de Lisboa (UNL), Portugal. <sup>5</sup>Department of Microbiology, Immunology and Biochemistry, University of Tennessee Health Science Center, Memphis, Tennessee, USA.

[\*] Correspondence to Luisa Mota-Vieira (Luisa.MQ.Vieira@azores.gov.pt)

| Demographic characterization                      | Patients  |      |
|---------------------------------------------------|-----------|------|
|                                                   | N = 202   | %    |
| <b>Age at infection (yr)</b>                      |           |      |
| Mean                                              | 48.2±16.4 | –    |
| Range                                             | 17-86     | –    |
| <b>Gender (n, %)</b>                              |           |      |
| Male                                              | 181       | 89.6 |
| Female                                            | 21        | 10.4 |
| <b>Profession (n, %)</b>                          |           |      |
| Farmer                                            | 41        | 20.3 |
| Unemployed                                        | 27        | 13.4 |
| Bricklayer                                        | 26        | 12.9 |
| Retired                                           | 24        | 11.9 |
| Housewife                                         | 12        | 5.9  |
| Students                                          | 11        | 5.5  |
| Federal employee                                  | 7         | 3.5  |
| Businessman                                       | 6         | 3.0  |
| Factory worker                                    | 4         | 2.0  |
| Others                                            | 44        | 21.8 |
| <b>Municipalities of São Miguel Island (n, %)</b> |           |      |
| Ponta Delgada                                     | 110       | 54.5 |
| Ribeira Grande                                    | 43        | 21.3 |
| Lagoa                                             | 15        | 7.4  |
| Vila Franca do Campo                              | 15        | 7.4  |
| Povoação                                          | 11        | 5.5  |
| Nordeste                                          | 6         | 3.0  |
| Santa Maria Island (n, %)                         | 2         | 1.0  |
| <b>Hospital department (n, %)</b>                 |           |      |
| Emergency                                         | 167       | 82.7 |
| Internal medicine inpatients                      | 18        | 8.9  |
| Others                                            | 17        | 8.4  |

**Table S1. Demographic characterization of the 202 patients suspected of leptospirosis.**

| Patients |      | qRT-PCR-HRM primers<br>(average $T_m \pm SD$ , °C) |                  | <i>Leptospira</i> spp    |
|----------|------|----------------------------------------------------|------------------|--------------------------|
| N = 46   | %    | LFB1 F/R                                           | G1/G2            |                          |
| 28       | 60.9 | 80.94 $\pm$ 0.27                                   | 79.36 $\pm$ 0.26 | <i>L. interrogans</i>    |
| 18       | 39.1 | 83.84 $\pm$ 0.27                                   | 81.82 $\pm$ 0.30 | <i>L. borgpetersenii</i> |

**Table S2. Determination of the melting temperatures ( $T_m$ ), by qRT-PCR-HRM with primer sets LFB1 F/R and G1/G2.** The assay was performed in the 46 patients with laboratory-confirmed leptospirosis (corresponding to 184 duplicate samples of serum and urine). Abbreviation: SD, standard deviation.
